# Supplementary material for: Longevity factor klotho enhances cognition in aged nonhuman primates
Source: PubMed Central journal article supplement (PMC10432271; doi:10.1038/s43587-023-00441-x), 2023-07-03
Supplement: 43587_2023_441_MOESM1_ESM.pdf [file 43587_2023_441_MOESM1_ESM.pdf]

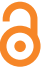

---

# Longevity factor klotho enhances cognition in aged nonhuman primates

---

In the format provided by the authors and unedited

**Supplementary Table 1.** Monkey details and sequence of testing in each case (monkey). Monkeys were only used again to test other treatments like Vehicle or other klotho doses after cognitive testing was confirmed to be at the monkey's baseline.

| <b>Case</b> | <b>Sex</b> | <b>Age</b> | <b>Sequence of test sessions</b>                                                |
|-------------|------------|------------|---------------------------------------------------------------------------------|
| 1           | F          | 26yrs      | baseline, vehicle, KL 30, vehicle, KL 20, baseline, vehicle, baseline           |
| 2           | F          | 23yrs      | baseline, vehicle, vehicle, KL 30, KL 10, baseline, KL 10, baseline             |
| 3           | F          | 18yrs      | baseline, vehicle, vehicle, KL 30, KL 10, baseline, baseline                    |
| 4           | M          | 17yrs      | baseline, vehicle, KL 30, vehicle, KL 20, baseline, baseline                    |
| 5           | F          | 24yrs      | baseline, vehicle, KL 30, vehicle, KL 20, baseline, baseline                    |
| 6           | F          | 26yrs      | baseline, vehicle, KL 30, vehicle, KL 10, baseline, baseline, vehicle, baseline |
| 7           | M          | 19yrs      | baseline, vehicle, vehicle, KL 10, baseline                                     |
| 8           | M          | 22yrs      | baseline, vehicle, vehicle, KL 30, KL 10, baseline, baseline, KL 10, baseline   |
| 9           | M          | 23yrs      | baseline, vehicle, KL 30, vehicle, KL 10, baseline, baseline, vehicle, baseline |
| 10          | F          | 23yrs      | baseline, vehicle, KL 10, baseline, baseline                                    |
| 11          | F          | 27yrs      | baseline, vehicle, vehicle, KL 30, baseline, KL 20, baseline                    |
| 12          | F          | 19yrs      | baseline, vehicle, vehicle, KL 30, baseline                                     |
| 13          | F          | 19yrs      | baseline, vehicle, KL 30, vehicle, baseline, KL 20, baseline                    |
| 14          | F          | 18yrs      | baseline, vehicle, KL 30, baseline, KL 20                                       |
| 15          | M          | 25yrs      | baseline, vehicle, vehicle, KL 30, baseline, KL 20, baseline                    |
| 16          | F          | 20yrs      | baseline, vehicle, KL 10, baseline                                              |
| 17          | F          | 15yrs      | baseline, vehicle, KL 10, baseline                                              |
| 18          | F          | 28yrs      | baseline, vehicle, vehicle, baseline                                            |
